# Supplementary material
Source: PubMed Central journal article supplement (PMC7323740)

**A pSer129  $\alpha$ Syn (81A)****Dosage  $\alpha$ Syn and  $\Delta$ 71-82  $\alpha$ Syn**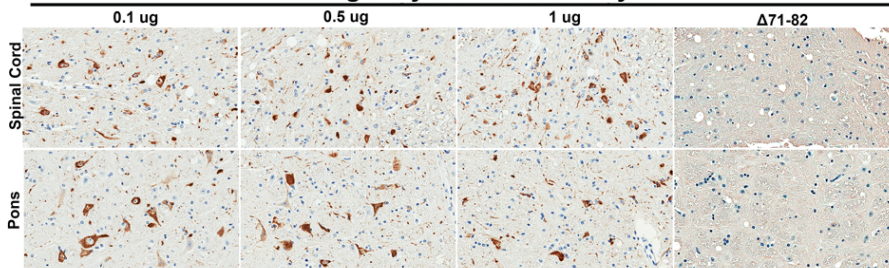**B p62 Sequestosome-1****Dosage  $\alpha$ Syn and  $\Delta$ 71-82  $\alpha$ Syn**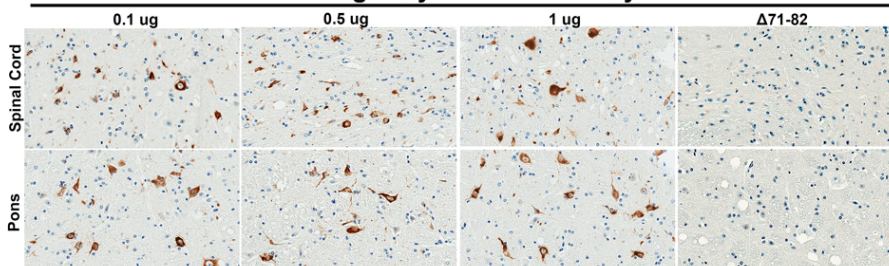**C 2-21  $\alpha$ Syn (2H6)****Dosage  $\alpha$ Syn and  $\Delta$ 71-82  $\alpha$ Syn**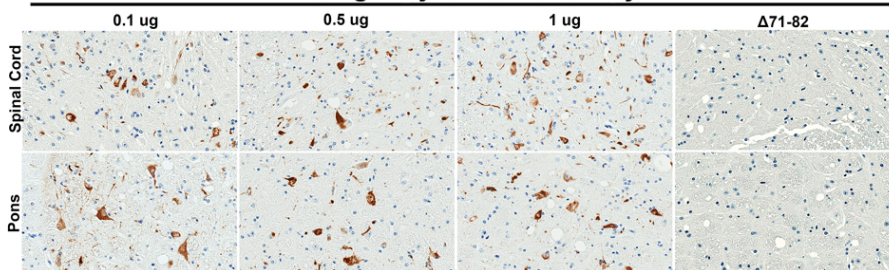**D 130-140  $\alpha$ Syn (94-3A10)****Dosage  $\alpha$ Syn and  $\Delta$ 71-82  $\alpha$ Syn**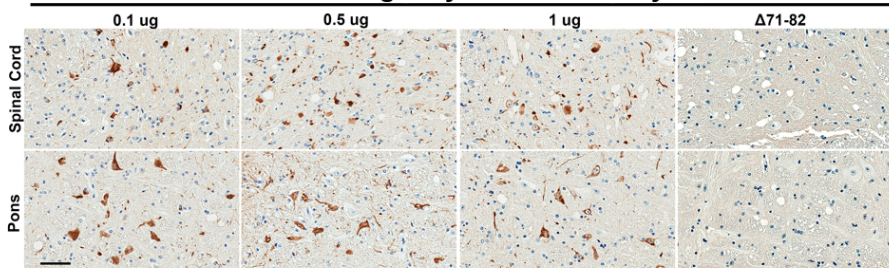

Supplement: NIHMS1595862-supplement-1.pdf [file NIHMS1595862-supplement-1.pdf]
